# Supplementary material for: Association between urinary sodium levels and iodine status in Korea
Source: PubMed Central journal article supplement — Korean J Intern Med. 2018 May 18;35(2):392–9. doi: 10.3904/kjim.2017.375 (PMC7061011; doi:10.3904/kjim.2017.375), 2018-05-18
Supplement: kjim-2017-375-suppl1.pdf [file kjim-2017-375-suppl1.pdf]

**Supplementary Table 1. Clinical characteristics according to urine Na/Cr ratio**

| Characteristic               | Urinary Na/Cr ratio, mmol/g |                       |              |
|------------------------------|-----------------------------|-----------------------|--------------|
|                              | Low (< 47)                  | Intermediate (47–114) | High (> 114) |
| <b>Sex</b>                   |                             |                       |              |
| Male                         | 480 (14.5)                  | 963 (27.5)            | 374 (10.4)   |
| Female                       | 408 (10.4)                  | 851 (22.5)            | 569 (14.7)   |
| <b>BMI, kg/m<sup>2</sup></b> |                             |                       |              |
| < 25                         | 637 (17.6)                  | 1,243 (33.9)          | 624 (16.5)   |
| ≥ 25                         | 251 (7.3)                   | 571 (16.1)            | 319 (8.6)    |
| <b>Hypertension</b>          |                             |                       |              |
| Yes                          | 107 (3.0)                   | 321 (9.2)             | 266 (7.1)    |
| No                           | 781 (21.9)                  | 1,493 (40.9)          | 677 (17.9)   |

Values are presented as number of total 3,645 participants (proportion of subjects, %).  
Na/Cr, sodium/creatinine; BMI, body mass index.
