# Supplementary material for: Association between urinary sodium levels and iodine status in Korea
Source: PubMed Central journal article supplement — Korean J Intern Med. 2018 May 18;35(2):392–9. doi: 10.3904/kjim.2017.375 (PMC7061011; doi:10.3904/kjim.2017.375), 2018-05-18
Supplement: kjim-2017-375-suppl2.pdf [file kjim-2017-375-suppl2.pdf]

**Supplementary Table 2. Clinical characteristics according to urine I/Cr ratio**

| Characteristic                         | Urine I/Cr ratio, $\mu\text{g/g}$ |                   |                   |
|----------------------------------------|-----------------------------------|-------------------|-------------------|
|                                        | Deficient (< 85)                  | Adequate (85–220) | Excessive (> 220) |
| <b>Sex</b>                             |                                   |                   |                   |
| Male                                   | 389 (11.5)                        | 682 (19.5)        | 746 (21.5)        |
| Female                                 | 257 (6.6)                         | 642 (16.9)        | 929 (24.0)        |
| <b>BMI, <math>\text{kg/m}^2</math></b> |                                   |                   |                   |
| < 25                                   | 407 (11.4)                        | 908 (24.3)        | 1,189 (32.3)      |
| $\geq$ 25                              | 239 (6.7)                         | 416 (12.1)        | 486 (13.2)        |
| <b>Hypertension</b>                    |                                   |                   |                   |
| Yes                                    | 103 (2.7)                         | 244 (6.3)         | 347 (10.2)        |
| No                                     | 543 (15.4)                        | 1,080 (30.1)      | 1,328 (35.3)      |

Values are presented as number of total 3,645 participants (proportion of subjects, %).  
I/Cr, iodine/creatinine; BMI, body mass index.
